# Supplementary material
Source: MDPI journal article supplement (https://www.mdpi.com/2073-4344/13/8/1214)
Supplement: s1 [file s1]

## Electronic Supplementary Information

### **Zinc Iodide-Metal Chloride-Organic Base: An Efficient Catalytic System for Synthesis of Cyclic Carbonates from Carbon Dioxide and Epoxides under Ambient Conditions**

Masatoshi Mihara,\* Shuichi Nakao, Takeo Nakai and Takumi Mizuno

Osaka Research Institute of Industrial Science and Technology,  
1-6-50 Morinomiya, Joto-ku, Osaka 536-8553, Japan  
E-mail: [mihara@omtri.or.jp](mailto:mihara@omtri.or.jp)

#### Table of Contents

|                                                                          |             |
|--------------------------------------------------------------------------|-------------|
| <b>Characterization of Compounds 2a-i.....</b>                           | <b>S2-4</b> |
| <b>IR spectra of ZnI<sub>2</sub>, NbCl<sub>5</sub>, or/and MTBD.....</b> | <b>S4</b>   |
| <b>References.....</b>                                                   | <b>S5</b>   |

### Characterization of Compounds 2a-i

$^1\text{H}$  and  $^{13}\text{C}$  NMR spectra were obtained on a JEOL JNM-ECA600 (600 MHz, 151MHz) instrument. Chemical shifts were reported in ppm relative to tetramethylsilane ( $\delta$ -units). Mass spectra were recorded on a SHIMADZU GCMS-QP2010 Ultra. 5-Membered cyclic carbonates **2a-i** were identified by comparison of their spectroscopic data ( $^1\text{H}$  and  $^{13}\text{C}$  NMR) with those in the literature.

#### Styrene carbonate (**2a**)<sup>34</sup>

Yield: 95% (white solid);

$^1\text{H}$  NMR (600 MHz,  $\text{CDCl}_3$ ):  $\delta$  4.35 (dd,  $J = 9.0, 7.8$  Hz, 1H), 4.80 (t-like,  $J = 8.4$  Hz, 1H), 5.67-5.69 (m, 1H), 7.36-7.47 (m, 5H);

$^{13}\text{C}$  NMR (151 MHz,  $\text{CDCl}_3$ ):  $\delta$  71.14, 77.97, 125.85, 129.19, 129.69, 135.76, 154.84;

MS (EI),  $m/z$  (%) = 164 ( $\text{M}^+$ , 50), 91 (71), 90 (100), 78 (74).

#### Propylene carbonate (**2b**)<sup>34</sup>

Yield: 90% (colorless liquid);

$^1\text{H}$  NMR (600 MHz,  $\text{CDCl}_3$ ):  $\delta$  1.50 (d,  $J = 6.0$  Hz, 3H), 4.04 (dd,  $J = 7.8, 7.2$  Hz, 1H), 4.57 (t-like,  $J = 8.4$  Hz, 1H), 4.84-4.90 (m, 1H);

$^{13}\text{C}$  NMR (151 MHz,  $\text{CDCl}_3$ ):  $\delta$  19.36, 70.59, 73.49, 154.98;

MS (EI),  $m/z$  (%) = 102 ( $\text{M}^+$ , 4), 87 (20), 58 (15), 57 (100).

#### 4-Phenoxymethyl-1,3-dioxolan-2-one (**2c**)<sup>67</sup>

Yield: 92% (white solid);

$^1\text{H}$  NMR (600 MHz,  $\text{CDCl}_3$ ):  $\delta$  4.16 (dd,  $J = 10.2, 3.6$  Hz, 1H), 4.24 (dd,  $J = 10.2, 4.2$  Hz, 1H), 4.55 (dd,  $J = 8.4, 6.0$  Hz, 1H), 4.62 (t-like,  $J = 8.4$  Hz, 1H), 5.01-5.05 (m, 1H), 6.90-6.92 (m, 2H), 7.01-7.03 (m, 1H), 7.30-7.33 (m, 2H);

$^{13}\text{C}$  NMR (151 MHz,  $\text{CDCl}_3$ ):  $\delta$  66.23, 66.83, 74.06, 114.57, 121.99, 129.69, 154.62, 157.72;

MS (EI),  $m/z$  (%) = 194 ( $\text{M}^+$ , 54), 107 (100), 94 (83), 77 (100).

#### 4-Chloromethyl-1,3-dioxolan-2-one (**2d**)<sup>34</sup>

Yield: 85% (colorless liquid);

$^1\text{H}$  NMR (600 MHz,  $\text{CDCl}_3$ ):  $\delta$  3.73-3.79 (m, 2H), 4.42 (dd,  $J = 9.0, 6.0$  Hz, 1H), 4.60 (t-like,  $J = 8.4$  Hz, 1H), 4.94-4.98 (m, 1H);

$^{13}\text{C}$  NMR (151 MHz,  $\text{CDCl}_3$ ):  $\delta$  43.56, 66.94, 74.19, 154.08;

MS (EI),  $m/z$  (%) = 136 ( $\text{M}^+$ , 0.4), 87 (100), 57 (8).

**4-Octyl-1,3-dioxolan-2-one (2e)**<sup>68</sup>

Yield: 89% (colorless liquid);

<sup>1</sup>H NMR (600 MHz, CDCl<sub>3</sub>): δ 0.89 (t, J = 6.6 Hz, 3H), 1.22-1.51 (m, 12H), 1.65-1.71 (m, 1H), 1.78-1.84 (m, 1H), 4.07 (t-like, J = 8.4 Hz, 1H), 4.53 (t-like, J = 8.4 Hz, 1H), 4.68-4.73 (m, 1H);

<sup>13</sup>C NMR (151 MHz, CDCl<sub>3</sub>): δ 14.03, 22.57, 24.31, 29.05, 29.09, 29.25, 31.72, 33.84, 69.36, 77.03, 155.06;

MS (EI), *m/z* (%) = 200 (M<sup>+</sup>, 0.01), 110 (21), 96 (50), 81 (73), 67 (88), 55 (100).

**4-Allyloxymethyl-1,3-dioxolan-2-one (2f)**<sup>34</sup>

Yield: 89% (colorless liquid);

<sup>1</sup>H NMR (600 MHz, CDCl<sub>3</sub>): δ 3.63 (dd, J = 10.8, 4.2 Hz, 1H), 3.69 (dd, J = 10.8, 4.2 Hz, 1H), 4.04-4.10 (m, 2H), 4.41 (dd, J = 8.4, 6.0 Hz, 1H), 4.51 (t-like, J = 8.4 Hz, 1H), 4.80-4.84 (m, 1H), 5.23-5.31 (m, 2H), 5.84-5.91 (m, 1H);

<sup>13</sup>C NMR (151 MHz, CDCl<sub>3</sub>): δ 66.23, 68.78, 72.55, 74.96, 117.90, 133.60, 154.90;

MS (EI), *m/z* (%) = 158 (M<sup>+</sup>, 0.06), 102 (36), 71 (55), 57 (100).

**4,4'-(Butane-1,4-diyl)-bis-1,3-dioxolan-2-one (2g)**<sup>67</sup>

Yield: 95% (colorless liquid);

<sup>1</sup>H NMR (600 MHz, CDCl<sub>3</sub>): δ 1.46-1.64 (m, 4H), 1.71-1.85 (m, 4H), 4.08 (t-like, J = 8.4 Hz, 2H), 4.55 (t-like, J = 8.4 Hz, 2H), 4.70-4.75 (m, 2H);

<sup>13</sup>C NMR (151 MHz, CDCl<sub>3</sub>): δ 24.17, 24.23, 33.67, 33.75, 69.24, 76.60, 154.83;

MS (EI), *m/z* (%) = 230 (M<sup>+</sup>, 0.02), 129 (19), 82 (47), 67 (100), 54 (78).

***cis*-Cyclohexene carbonate (*cis*-2h)**<sup>69</sup>

Yield: 32% (white solid);

<sup>1</sup>H NMR (600 MHz, CDCl<sub>3</sub>): δ 1.40-1.46 (m, 2H), 1.60-1.66 (m, 2H), 1.89-1.92 (m, 4H), 4.67-4.70 (m, 2H);

<sup>13</sup>C NMR (151 MHz, CDCl<sub>3</sub>): δ 19.13, 26.74, 75.70, 155.32;

MS (EI), *m/z* (%) = 142 (M<sup>+</sup>, 0.2), 88 (33), 69 (98), 55 (100).

***trans*-Cyclohexene carbonate (*trans*-2h)**<sup>69</sup>

Yield: 6% (white solid);

<sup>1</sup>H NMR (600 MHz, CDCl<sub>3</sub>): δ 1.37-1.46 (m, 2H), 1.65-1.72 (m, 2H), 1.91-1.96 (m, 2H), 2.26-2.29 (m, 2H), 4.00-4.05 (m, 2H);

<sup>13</sup>C NMR (151 MHz, CDCl<sub>3</sub>): δ 23.17, 28.21, 83.49, 155.06;

MS (EI), *m/z* (%) = 142 (M<sup>+</sup>, 0.2), 69 (100), 57 (55).

***trans*-4,5 Diphenyl-1,3-dioxolan-2-one (2i)** <sup>34</sup>

Yield: 53% (white solid);

<sup>1</sup>H NMR (600 MHz, CDCl<sub>3</sub>): δ 5.44 (s, 2H), 7.31-7.33 (m, 4H), 7.43-7.45 (m, 6H);

<sup>13</sup>C NMR (151 MHz, CDCl<sub>3</sub>): δ 85.36, 126.02, 129.21, 129.78, 134.76, 154.08;

MS (EI), *m/z* (%) = 240 (M<sup>+</sup>, 24), 195 (25), 167 (50), 90 (100).

**IR spectra of ZnI<sub>2</sub>, NbCl<sub>5</sub>, or/and MTBD**

After ZnI<sub>2</sub> (0.12 mmol), MTBD (0.3 mmol), or/and NbCl<sub>5</sub> (0.03 mmol) were mixed by a spatula, IR spectra were recorded on a JASCO FT-IR-4100/Smiths Detection DuraScope instrument.

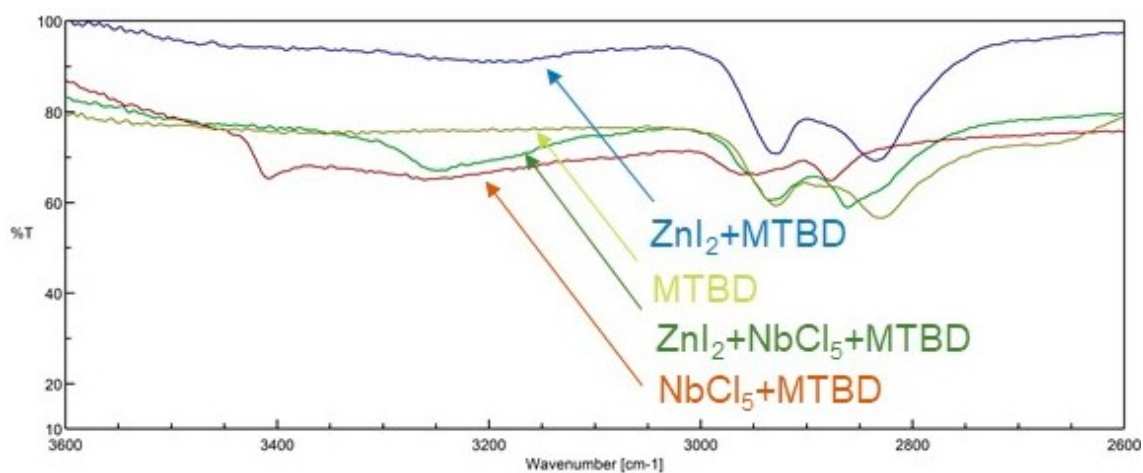

(a)

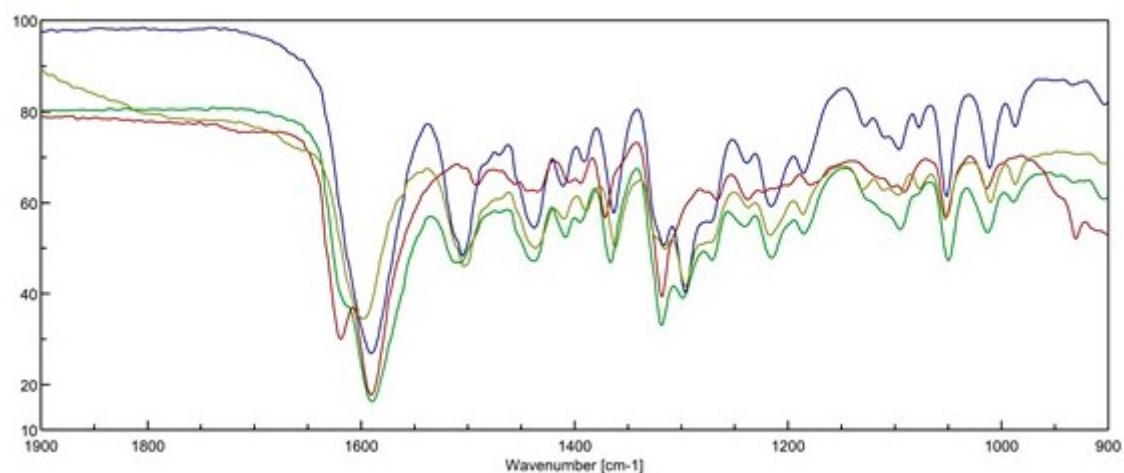

(b)

Figure S1. IR spectra of MTBD, ZnI<sub>2</sub>+MTBD, NbCl<sub>5</sub>+MTBD, and ZnI<sub>2</sub>+NbCl<sub>5</sub>+MTBD (a: 3600-2600 cm<sup>-1</sup>, b: 1900-900 cm<sup>-1</sup>).
